# Supplementary material
Source: PubMed Central journal article supplement (PMC3806655)
Supplement: NIHMS447024-supplement-1.pdf [file NIHMS447024-supplement-1.pdf]

# Synthesis of decacationic [60]fullerene decaiodides giving photoinduced production of superoxide radicals and effective PDT-mediation on antimicrobial photoinactivation

Min Wang <sup>a</sup>, Satyanarayana Maragani <sup>a</sup>, Liyi Huang <sup>b,c</sup>, Seaho Jeon <sup>a</sup>, Taizoon Canteenwala <sup>a</sup>, Michael R. Hamblin <sup>b,c,d,\*</sup>, Long Y. Chiang <sup>a,e,\*</sup>

<sup>a</sup> *Department of Chemistry, Institute of Nanoscience and Engineering Technology, University of Massachusetts, Lowell, MA 01854, United States*

<sup>b</sup> *Wellman Center for Photomedicine, Massachusetts General Hospital, Boston, MA 02114, United States*

<sup>c</sup> *Department of Dermatology, Harvard Medical School, Boston, MA 02115, United States*

<sup>d</sup> *Harvard–MIT Division of Health Sciences and Technology, Cambridge, MA 02139, United States*

<sup>e</sup> *Department of Laboratory Medicine and Pathobiology, University of Toronto, Toronto, ON M5S 1A8, Canada*

## Supporting Information

**Figure S1.** <sup>1</sup>H NMR spectra of (a) **2** in CDCl<sub>3</sub>, (b) **3** in CDCl<sub>3</sub>, (c) **4** in CDCl<sub>3</sub>, (d) **5** in DMSO-*d*<sub>6</sub>, and (e) **1-(Γ)**<sub>10</sub> in DMSO-*d*<sub>6</sub> in Scheme 1.

**Figure S2.** FT-IR spectra of (a) M(C<sub>3</sub>N<sub>6</sub><sup>+</sup>C<sub>3</sub>)<sub>2</sub> (**5**), (b) C<sub>60</sub>[>M(C<sub>3</sub>N<sub>6</sub><sup>+</sup>C<sub>3</sub>)<sub>2</sub>]-(**Γ**)<sub>10</sub> [**1-(Γ)**<sub>10</sub>], and (c) C<sub>60</sub>[>M(C<sub>3</sub>N<sub>6</sub><sup>+</sup>C<sub>3</sub>)<sub>2</sub>]-(**TFA**<sup>-</sup>)<sub>10</sub> [**1-(TFA**<sup>-</sup>)<sub>10</sub>] in Scheme 1.

**Figure S3.** FT-IR spectra of (a) C<sub>60</sub>[>M(*t*-Bu)<sub>2</sub>] (**6**), (b) precursor arm M(C<sub>3</sub>N<sub>6</sub><sup>+</sup>C<sub>3</sub>H)<sub>2</sub>, (c) C<sub>60</sub>[>M(C<sub>3</sub>N<sub>6</sub><sup>+</sup>C<sub>3</sub>H)<sub>2</sub>] **7**, (d) C<sub>60</sub>[>M(C<sub>3</sub>N<sub>6</sub><sup>+</sup>C<sub>3</sub>)<sub>2</sub>]-(**Γ**)<sub>10</sub> [**1-(Γ)**<sub>10</sub>], and (e) C<sub>60</sub>[>M(C<sub>3</sub>N<sub>6</sub><sup>+</sup>C<sub>3</sub>)<sub>2</sub>]-(**TFA**<sup>-</sup>)<sub>10</sub> [**1-(TFA**<sup>-</sup>)<sub>10</sub>] in Scheme 2.

**Figure S4.**  $^{13}\text{C}$  NMR spectra of (a) **6** in  $\text{CDCl}_3\text{-CS}_2$ , (b) **7** in  $\text{DMF-}d_7\text{-CDCl}_3\text{-CS}_2$ , and (c)  $\text{C}_{60}[\text{>M}(\text{C}_3\text{N}_6^+\text{C}_3)_2\text{-(TFA}^-)_{10}$  [**1**-( $\text{TFA}^-$ ) $_{10}$ ] in  $\text{DMSO-}d_6\text{-CDCl}_3\text{-CS}_2$  in Scheme 2.

**Figure S5.** Analysis of fragmented mass ions based on both MALDI-TOF and ESI mass spectra of  $\text{C}_{60}[\text{>M}(\text{C}_3\text{N}_6^+\text{C}_3)_2\text{-(}\Gamma^-)_{10}$  [**1**-( $\Gamma^-$ ) $_{10}$ ] in Fig. 3.

**Figure S6.** Illumination time-dependent fluorescent intensity increase of fluorescein probe TFFC in PBS media ( $\text{pH}$  7.4) in the presence of (a) xanthine/xanthine oxidase by the addition in two steps, (b) xanthine/xanthine oxidase followed by the addition of superoxide dismutase, and (c) xanthine/xanthine oxidase and superoxide dismutase at the same time, showing clearly the fluorescent intensity increase of the fluorescein probe rising from the reaction of DNBS-TFFC with superoxide radical ( $\text{O}_2^{\cdot-}$ ). The fluorometric traces were collected at  $\lambda_{\text{em}}$  530 nm with  $\lambda_{\text{ex}}$  480 nm.

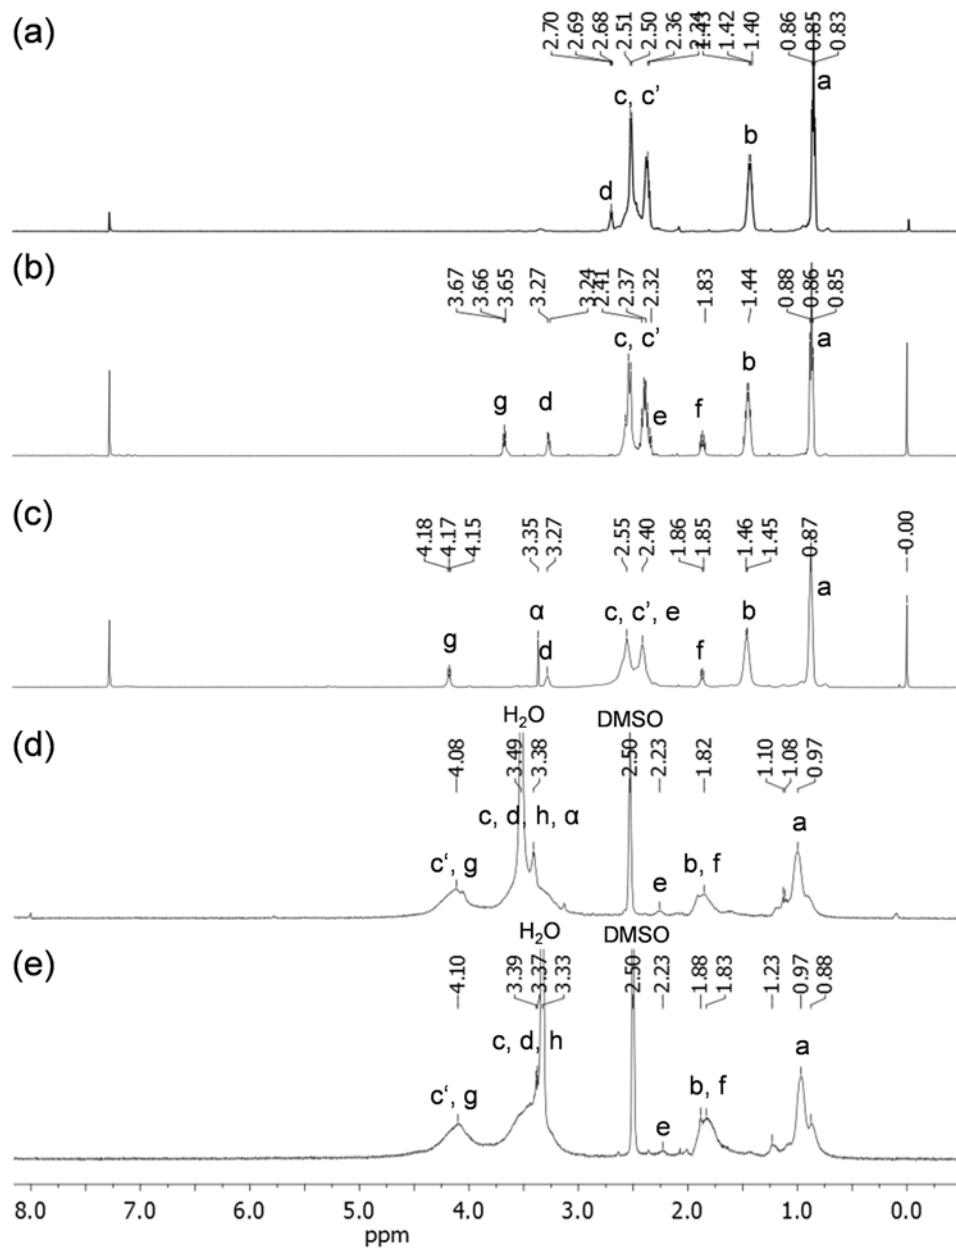

**Fig. S1.**  $^1\text{H}$  NMR spectra of (a) **2** in  $\text{CDCl}_3$ , (b) **3** in  $\text{CDCl}_3$ , (c) **4** in  $\text{CDCl}_3$ , (d) **5** in  $\text{DMSO-}d_6$ , and (e) **1-( $\Gamma$ )<sub>10</sub>** in  $\text{DMSO-}d_6$  in Scheme 1.

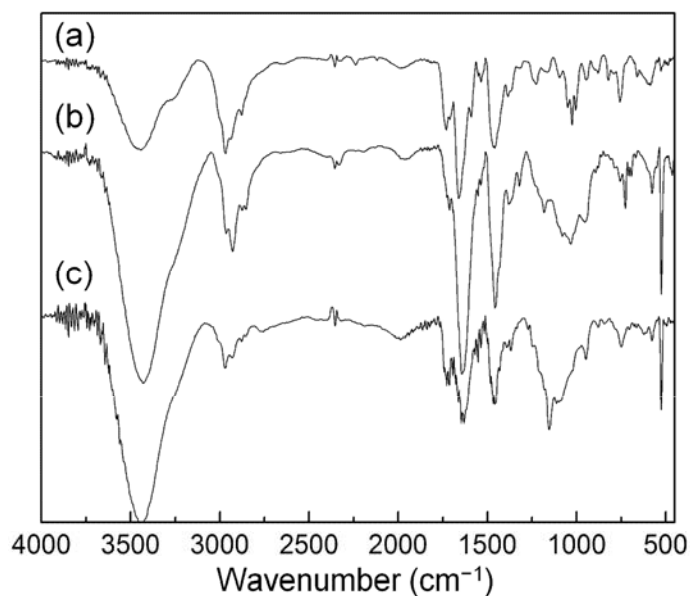

**Fig. S2.** FT-IR spectra of (a)  $M(C_3N_6^+C_3)_2$  (**5**), (b)  $C_{60}[>M(C_3N_6^+C_3)_2]-(\Gamma)_{10}$  [**1**-( $\Gamma$ )<sub>10</sub>], and (c)  $C_{60}[>M(C_3N_6^+C_3)_2]-(TFA^-)_{10}$  [**1**-( $TFA^-$ )<sub>10</sub>] in Scheme 1.

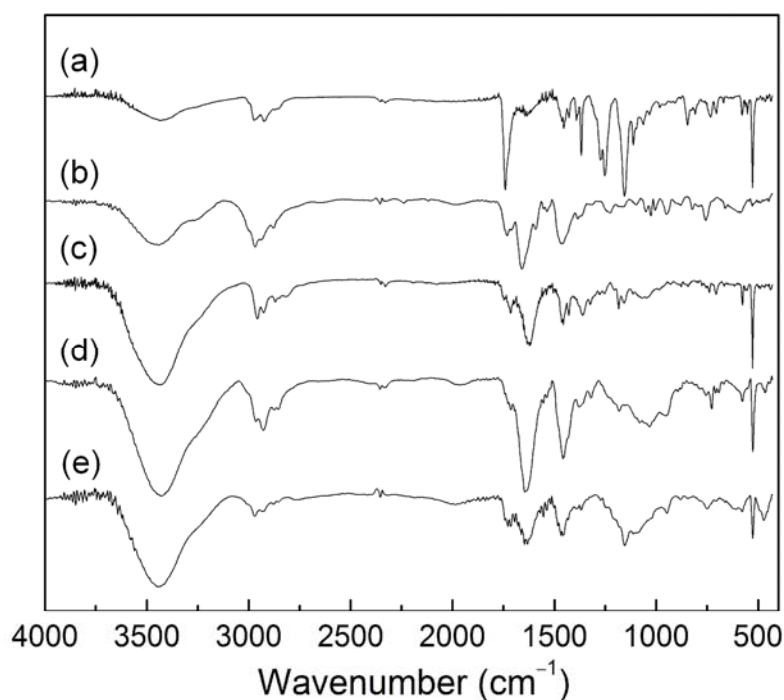

**Fig. S3.** FT-IR spectra of (a)  $C_{60}[>M(t-Bu)_2]$  (**6**), (b) precursor arm  $M(C_3N_6^+C_3H)_2$ , (c)  $C_{60}[>M(C_3N_6^+C_3H)_2]$  **7**, (d)  $C_{60}[>M(C_3N_6^+C_3)_2]-(\Gamma)_{10}$  [**1**-( $\Gamma$ )<sub>10</sub>], and (e)  $C_{60}[>M(C_3N_6^+C_3)_2]-(TFA^-)_{10}$  [**1**-( $TFA^-$ )<sub>10</sub>] in Scheme 2.

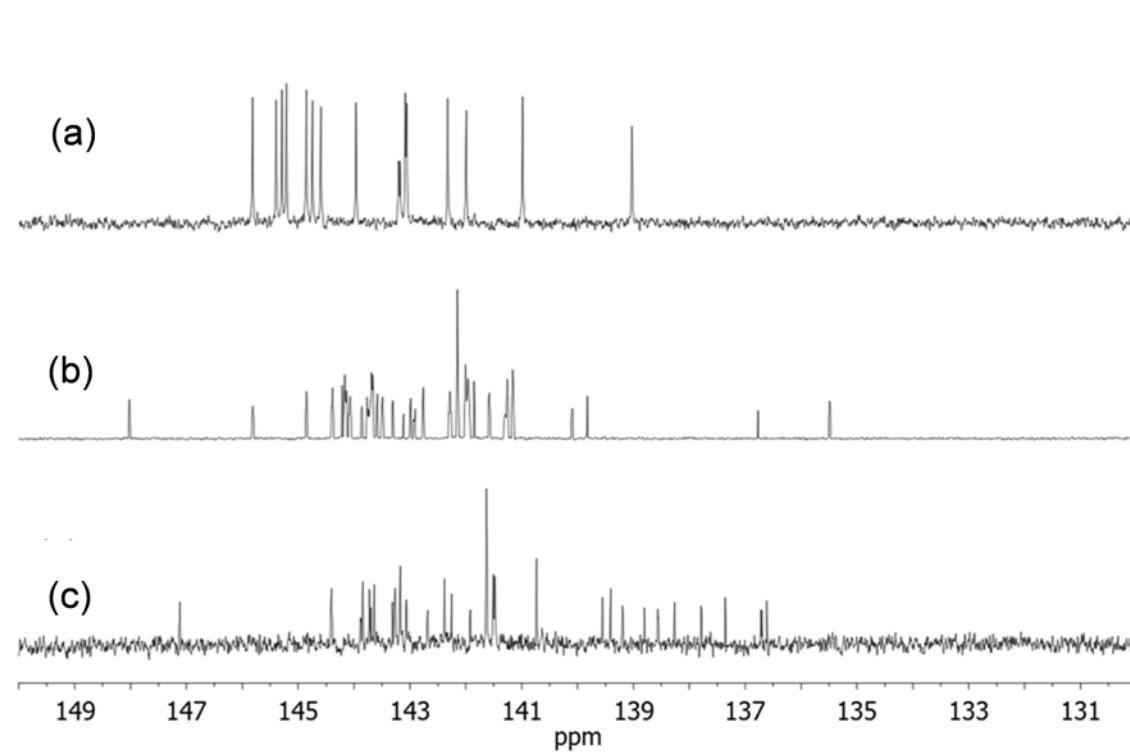

**Fig. S4.**  $^{13}\text{C}$  NMR spectra of (a) **6** in  $\text{CDCl}_3\text{-CS}_2$ , (b) **7** in  $\text{DMF-}d_7\text{-CDCl}_3\text{-CS}_2$ , and (c)  $\text{C}_{60}[\text{>M}(\text{C}_3\text{N}_6^+\text{C}_3)_2](\text{TFA}^-)_{10}$  [**1**-( $\text{TFA}^-$ ) $_{10}$ ] in  $\text{DMSO-}d_6\text{-CDCl}_3\text{-CS}_2$  in Scheme 2.

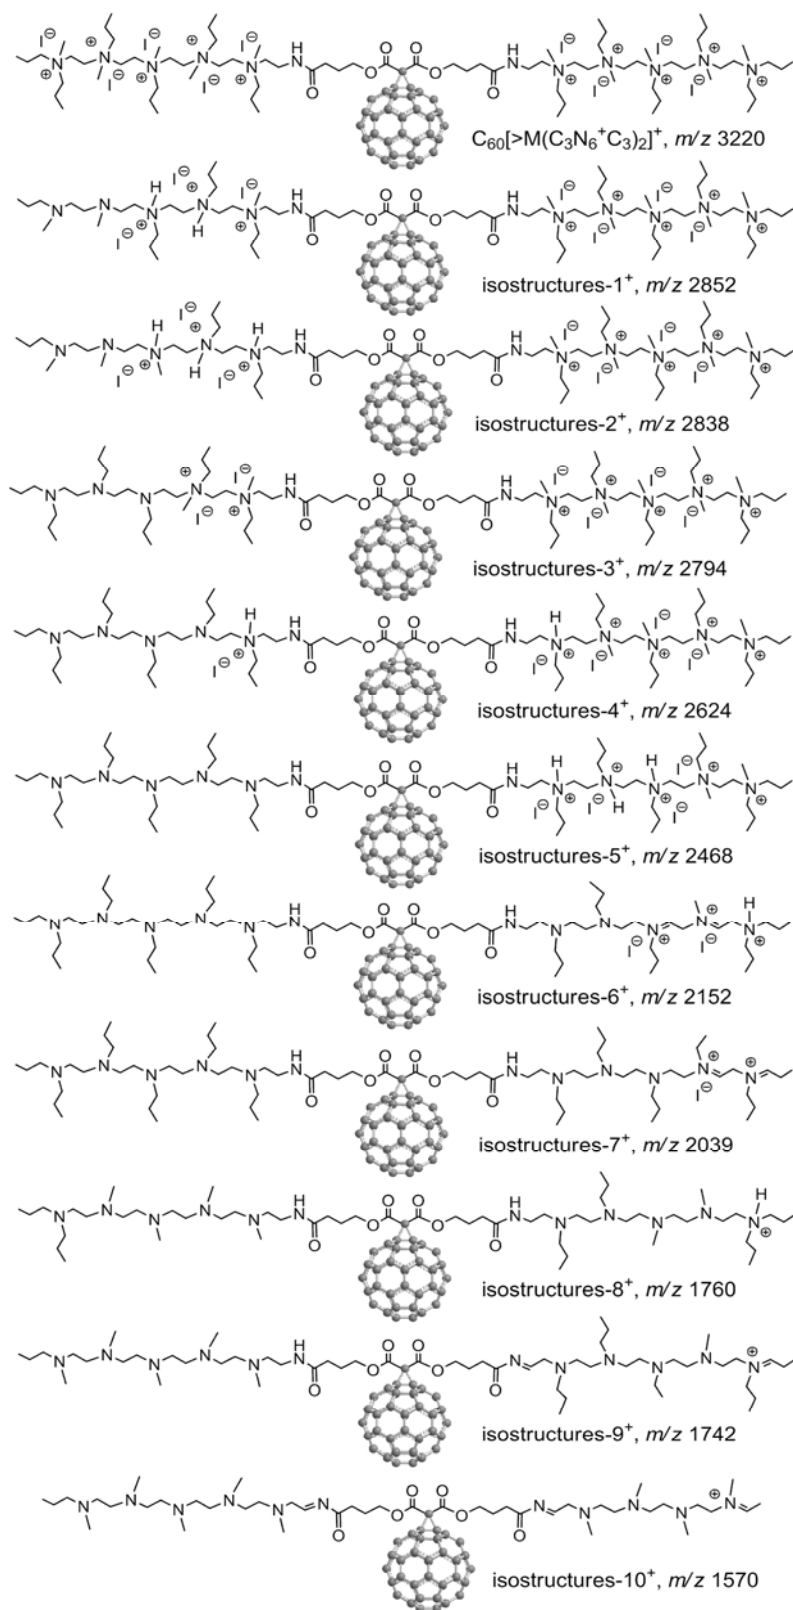

**Fig. S5.** Analysis of fragmented mass ions based on both MALDI-TOF and ESI mass spectra of  $C_{60}[>M(C_3N_6^+C_3)_2]-(\Gamma)_{10}$  [**1**-( $\Gamma$ )<sub>10</sub>] in Fig. 3.

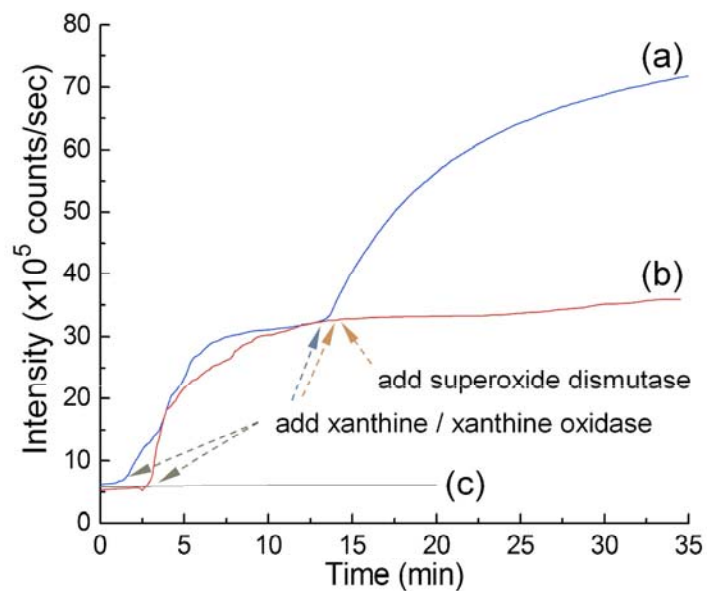

**Fig. S6.** Illumination time-dependent fluorescent intensity increase of fluorescein probe TFFC in PBS media (*pH* 7.4) in the presence of (a) xanthine/xanthine oxidase by the addition in two steps, (b) xanthine/xanthine oxidase followed by the addition of superoxide dismutase, and (c) xanthine/xanthine oxidase and superoxide dismutase at the same time, showing clearly the fluorescent intensity increase of the fluorescein probe rising from the reaction of DNBS-TFFC with superoxide radical ( $O_2^{\cdot-}$ ). The fluorometric traces were collected at  $\lambda_{em}$  530 nm with  $\lambda_{ex}$  480 nm.
